# Supplementary material for: Relationship between accelerometer-measured sleep duration and Stroop performance: a functional near-infrared spectroscopy study among young adults
Source: PeerJ. 2024 Feb 28;12:e17057. doi: 10.7717/peerj.17057 (PMC10908256; doi:10.7717/peerj.17057)
Supplement: Supplemental Information 1 [file peerj-12-17057-s001.xlsx]

## Sheet: Rawdata
city_countryside	education	BMI	Weight	Age	Gender	Total_Sleep_Time	Stroop_hboBeta1_1	Stroop_hboBeta1_2	Stroop_hboBeta1_3	Stroop_hboBeta1_4	Stroop_hboBeta1_5	Stroop_hboBeta1_6	Stroop_hboBeta1_7	Stroop_hboBeta1_8	Stroop_hboBeta1_9	Stroop_hboBeta1_10	Stroop_hboBeta1_11	Stroop_hboBeta1_12	Stroop_hboBeta1_13	Stroop_hboBeta1_14	Stroop_hboBeta1_15	Stroop_hboBeta1_16	Stroop_hboBeta1_17	Stroop_hboBeta1_18	Stroop_hboBeta1_19	Stroop_hboBeta1_20	Stroop_hboBeta1_21	Stroop_hboBeta1_22	Stroop_hboBeta1_23	Stroop_hboBeta1_24	Stroop_hboBeta2_1	Stroop_hboBeta2_2	Stroop_hboBeta2_3	Stroop_hboBeta2_4	Stroop_hboBeta2_5	Stroop_hboBeta2_6	Stroop_hboBeta2_7	Stroop_hboBeta2_8	Stroop_hboBeta2_9	Stroop_hboBeta2_10	Stroop_hboBeta2_11	Stroop_hboBeta2_12	Stroop_hboBeta2_13	Stroop_hboBeta2_14	Stroop_hboBeta2_15	Stroop_hboBeta2_16	Stroop_hboBeta2_17	Stroop_hboBeta2_18	Stroop_hboBeta2_19
2	4	19.9704	49	23	2	476.86	0.107036	0.0545	0.0347	-0.213834	-0.701979	0.21033	-0.0958	0.0582	0.329699	-0.154314	-0.801891	0.0228	-1.54766	-3.04908	0.455401	-0.293026	-0.251556	0.270108	0.389106	0.00985	0.0884	-0.308207	-0.261941	0.282957	-0.194978	-0.0661	0.0975	2.04155	0.962682	-0.11089	-0.806761	-1.16359	0.104054	0.0721	0.487433	-0.0423	0.488665	-0.619837	0.331665	-3.66046	-2.66702	0.90389	0.738344
1	5	19.534	52	23	2	462	0.09	0.359554	-0.0322	-0.0981	0.1884	-0.00803	-0.41244	0.044	0.0942	0.112739	0.4694	-0.0285	-0.210794	-0.175091	0.0134	-0.268591	0.0286	0.0258	0.393861	0.643186	-0.0587	-0.198595	-0.04	0.0451	-0.145475	0.160878	0.00704	0.27733	0.485669	-0.02	-0.58902	0.0148	0.0548	0.345192	0.525416	-0.0728	-0.0318	-0.0649	0.00669	-0.196628	-0.333657	-0.00155	-0.0954
1	5	17.7734	46	22	2	453.75	0.511161	0.946794	-0.0415	1.2404	1.5762	-0.327436	1.43082	0.721466	-1.06864	0.454862	1.06962	-0.398282	0.631627	1.00961	0.00929	-0.486246	-0.85524	0.932869	0.769068	0.536588	-0.228362	-0.679975	-0.682155	0.913784	0.461892	-0.0601	0.317877	0.563442	0.692014	-0.113153	0.409902	-0.13707	0.289322	-0.0327	-0.253973	0.0313	1.66934	3.16116	-0.589928	1.76178	1.43904	-0.194989	0.833229
2	7	19.2538	56	24	2	445.17	-0.688212	-0.474636	0.820837	0.0575	0.335638	0.493344	0.219373	0.725451	0.0198	-0.404598	-0.364741	0.628152	0.904271	1.0649	-0.577468	0.0867	0.05	0.0581	0.603662	0.724512	-0.278183	-0.144454	0.391556	0.0347	-0.399338	-0.409965	0.321479	0.197115	0.184791	-0.168347	-0.190637	0.543346	0.274239	-0.282005	-0.208813	0.302471	-0.278337	-0.482884	0.299655	0.597081	0.99724	-0.0665	0.373972
1	9	19.1349	55	28	2	439.43	0.0172	0.00956	-0.00462	0.0388	-0.0548	0.000382	-0.0987	-0.0513	-0.0437	0.117575	0.1282	-0.0517	-0.0571	-0.15711	-0.00492	0.0549	0.0622	-0.0147	-0.0346	-0.124104	-0.0659	-0.202816	-0.0288	0.0214	0.0274	0.0191	0.00835	-0.23215	-0.485064	-0.0283	-0.543106	-0.831893	0.0469	0.0302	0.0275	0.00112	-0.00268	-0.0755	-0.039	-0.0986	-0.226464	-0.0472	0.108298
1	8	22.1462	69	25	2	431.75	NA	NA	NA	NA	NA	NA	NA	NA	NA	NA	NA	NA	NA	NA	NA	NA	NA	NA	NA	NA	NA	NA	NA	NA	NA	NA	NA	NA	NA	NA	NA	NA	NA	NA	NA	NA	NA	NA	NA	NA	NA	NA	NA
1	5	25.7099	86	31	1	429.57	-0.266312	0.111369	-0.0966	1.6037	0.370559	-0.359698	-0.139699	-0.464499	-0.00673	1.26292	0.275024	-0.167634	1.57248	2.09745	-0.170615	-0.0377	-0.122118	-0.0331	1.81924	2.03141	-0.195059	0.403564	-0.22208	0.0472	0.423996	0.132739	-0.0609	0.596251	0.948046	-0.0275	0.420468	-1.01423	0.0165	0.321025	-0.0309	-0.072	0.517425	0.821484	0.552927	0.570425	0.791404	0.187035	-0.0424
1	8	20.7098	52	26	2	422	0.400404	0.299586	-0.102732	-0.426767	0.815546	-0.273686	0.0868	0.305138	-0.221909	-0.142727	0.272561	-0.0466	2.50681	1.27889	-0.766235	-0.952933	0.961624	-0.285211	2.06851	0.207647	-0.246447	-0.735071	0.469471	-0.0676	-0.898841	0.0744	0.218013	1.97214	0.0585	-0.646063	0.91169	-0.392275	0.219388	-3.82446	-0.290743	0.5398	5.92191	1.18679	-1.56891	-0.0254	0.136744	0.425197	3.25344
1	10	20.6499	51	28	2	420.5	0.474689	0.246142	-0.46301	0.0693	0.184323	-0.338597	0.289143	0.125879	-0.449288	-0.214142	-0.719632	0.15764	-1.19306	-1.12022	0.645899	0.119965	-0.229222	-0.0548	-0.262083	-0.747333	0.165158	-0.0714	-1.0933	0.541024	-0.479515	-1.11463	0.346758	-0.253431	-0.482159	0.299549	-1.18199	-0.835569	0.582136	-0.287884	-0.951173	0.14271	0.0122	0.200259	-0.17586	-0.521594	-0.33187	-0.062	0.348363
1	5	21.1601	63	25	1	415	0.62889	0.0334	-0.0926	0.444375	0.00381	-0.0357	0.165597	-0.554159	0.0712	0.234554	-0.297452	0.016	0.513124	-0.00337	-0.0276	0.0518	-0.436698	0.0398	0.328801	-0.0934	0.0186	0.283267	0.351328	-0.0573	-0.037	0.0885	0.00559	0.377879	0.255323	0.0114	0.056	-0.899053	0.0866	0.371252	-0.23087	0.0442	0.326688	-0.13992	-0.0238	0.0926	-0.27021	-0.0353	0.597769
1	8	19.4531	50	24	2	412.6	0.380366	0.198007	-0.0142	0.29984	0.162648	-0.0122	0.381121	0.0763	0.0228	0.256278	0.161664	0.0013	0.209927	0.135568	0.00781	0.138873	0.0708	0.0139	0.192562	0.0439	0.0168	0.438067	0.0233	-0.0074	0.0491	0.0273	0.0454	-0.354837	-0.219368	-0.00172	0.340978	-0.0596	0.025	0.546969	0.0585	0.0256	-0.990474	-0.760779	0.794618	0.317711	0.067	0.0645	-3.62903
1	7	26.3728	70	24	2	409.71	-0.143193	-0.0672	-0.00582	-0.171695	-0.049	3.92e-05	-0.26668	-0.150618	0.0146	-0.321123	-0.235634	0.00406	-0.11446	-0.0118	-0.000673	-0.362873	-0.205509	0.0197	-0.211131	-0.122645	0.00932	-0.00292	-0.00577	0.00247	-0.227438	-0.165766	0.001	-0.0405	-0.0191	0.00582	-0.0931	-0.191802	0.0197	-0.0157	-0.0177	0.00235	-0.159829	-0.174883	0.0498	-0.285646	-0.235928	0.149582	-0.399974
1	5	19.3686	57	24	2	404.86	-0.240677	-0.670193	0.0852	-0.206704	-0.598855	0.051	-0.183198	-0.852298	0.124865	-0.208342	-0.736665	0.0675	-0.25126	-0.693734	0.0622	-0.0948	-0.510234	0.0646	-0.456825	-0.953137	0.107141	-0.204059	0.0814	0.00645	-0.351221	-0.7757	0.0718	-0.307965	-0.66333	0.0856	-0.255982	0.272485	0.00642	-0.417075	-0.423012	0.0528	0.654426	0.837098	-0.0495	0.212261	0.445528	-0.0279	-0.838235
1	7	19.0264	48	27	2	403.43	-0.00188	-0.00217	0.00219	0.543665	0.215092	-0.0375	0.319367	0.183549	-0.0126	-0.0479	0.00706	-0.00111	0.220186	0.192632	-0.0158	-0.0996	-0.137168	0.0274	0.22422	0.336595	-0.00033	-0.0849	-0.293291	0.0536	-0.00488	-0.000529	0.0026	0.225589	0.257657	-0.00402	0.390546	0.349304	-0.0302	0.39318	0.341823	-0.0205	-0.615063	-0.242585	0.0539	-2.50043	-0.948786	0.311871	0.147377
1	8	23.7728	NA	25	2	401.33	2.97472	0.153798	-0.781904	3.85334	0.920141	-0.704085	0.462626	-0.378011	-0.0558	1.83145	0.583619	-0.581473	1.71538	0.327882	-0.210376	-0.199093	-0.0841	0.0708	-0.316144	-0.303716	0.024	0.27182	-0.741606	-0.112809	-0.129644	0.302644	0.0796	0.121822	-0.0999	-0.031	-0.00891	-0.729465	0.00285	-0.128539	-0.140948	-0.00782	2.17168	-1.62532	-0.250824	2.13057	0.578614	-0.174941	5.55217
2	11	17.7699	54	30	2	399	0.0855	0.0294	-0.0122	0.527722	0.392225	-0.0645	0.165496	-0.379453	0.0397	0.307313	0.258158	-0.0348	0.220816	-0.00319	-0.0124	-0.0389	-0.241719	0.0151	0.164065	0.0256	-0.0266	0.162537	-0.356058	0.0691	-0.00428	-0.00283	0.00219	0.253451	0.140403	-0.0251	0.270086	-1.13849	0.116958	0.0102	0.0544	-0.0114	0.777163	0.548317	-0.0599	-0.00592	0.307372	-0.0114	0.254633
1	9	21.1073	61	25	1	394	0.0619	-0.387757	0.267318	-0.870162	-1.19655	0.412591	-0.054	-0.295789	0.0789	-0.811811	-0.492995	0.353477	-0.287121	0.0217	0.0658	-0.190247	-0.350096	0.124934	-0.362348	-0.178727	0.125184	0.356681	0.234002	0.054	-0.013	-0.0149	0.00216	-0.116485	0.126151	0.0808	1.343	1.81784	-0.277964	0.355642	0.198063	0.0154	2.10863	0.0866	-0.114832	0.0646	0.123805	0.0628	2.61951
2	5	22.6939	68	23	1	394	-0.0332	0.309422	-0.0469	0.250547	0.175514	-0.108999	0.289871	0.0997	0.0403	-0.111386	-0.0373	-0.0756	-0.576045	-0.530682	-0.0229	0.304399	0.457655	0.0138	0.437946	0.391188	-0.00684	-0.367063	-1.32408	-0.0134	0.278674	0.476048	0.00461	0.31985	0.514175	-0.0128	0.750865	1.96752	0.281364	0.196994	0.314589	0.0105	0.512514	0.181575	-0.0319	-0.135765	-2.81346	-0.252367	-0.967082
1	6	18.9873	47	23	2	390.57	-1.08082	-0.796717	0.467305	-0.157966	-0.000565	0.243189	-0.0837	-0.312733	0.125629	-0.721872	-0.784885	0.434563	1.01635	0.0607	0.249218	-0.273155	-0.521233	0.289671	-0.461583	-0.51375	0.392206	0.100847	-0.0664	0.163508	0.222974	-0.320188	0.097	-0.227643	-0.290958	0.383891	0.26828	0.311159	-0.0425	0.293364	0.0283	0.0201	4.17588	-1.40517	-0.195053	-0.385278	0.339263	-0.0149	6.26467
1	5	18.2099	70	0	1	388.5	-0.213477	-0.237072	0.0201	-0.239178	-0.197177	0.0374	-0.174509	0.188933	0.0303	-0.173018	-0.117473	0.0279	-0.198848	-0.110234	0.0319	-0.130206	0.0156	0.0334	-0.267631	-0.155633	-0.00626	-0.159738	-0.100076	0.0171	-0.245215	-0.0596	0.0405	-0.107937	-0.0297	0.0143	-0.351971	0.103738	0.0683	-0.164454	-0.10142	0.0277	-0.0412	-0.00623	0.0133	-0.316469	-0.880568	0.491902	-0.00976
1	6	18.6095	52	24	2	386.67	0.0217	0.161302	-0.00584	-0.148655	0.119155	0.0446	0.124071	0.152313	0.0119	0.0789	0.134594	0.00514	-0.431722	0.232354	0.0325	0.119217	0.202348	0.00666	-0.138096	0.254622	-0.0328	0.126033	0.00797	0.0662	0.417405	0.127136	-0.0109	0.302088	0.20048	-0.00425	0.155396	-0.00299	0.0617	0.375951	0.166881	0.0162	0.0219	0.250562	0.122465	-0.254644	0.0791	0.038	0.381747
1	6	20.1771	57	24	2	386	-0.00484	-0.159199	0.0305	-0.296374	0.244894	-0.539416	1.27125	0.70394	-0.860037	0.0489	-0.0663	0.0224	1.48163	1.41353	-0.177346	1.26317	0.777815	-0.945713	0.405124	0.413488	-0.063	1.27902	0.788394	-0.957791	-0.00238	0.0215	0.00281	0.129313	-0.0642	-0.0686	0.31096	0.132914	0.0068	0.28823	0.0749	-0.0396	-0.279061	-0.279766	0.133498	-8.67674	3.70441	1.16694	0.389069
2	5	24.2123	65	23	1	386	-0.120161	-0.0484	0.00522	-0.0669	-0.0442	0.0208	0.0281	0.571034	0.0157	-0.246463	-0.135865	0.0274	0.0368	-0.0495	0.0672	-0.224742	0.0969	0.0398	-0.18185	-0.134041	0.0258	-0.0424	0.795195	-0.00518	-0.0676	-0.00227	0.00567	-0.00356	-0.00766	-0.0037	-0.158874	0.643478	0.0468	-0.206255	-0.125627	0.0561	-0.0334	-0.105865	0.0044	-0.299725	-0.205154	0.0424	0.0978
2	5	28.5061	87	21	1	384.71	2.49408	0.0628	0.767068	2.00205	0.165132	0.300829	0.897729	0.13793	0.212491	0.728825	-0.0744	0.412079	1.09999	0.700571	-0.411143	0.0311	-0.384368	0.147881	-3.80122	-1.26062	0.0416	0.0121	-0.24008	0.172121	0.174743	-0.427099	0.188706	0.567398	0.151104	-0.126117	0.265942	-0.458609	0.274397	0.686737	-0.308	0.00299	0.403452	0.0619	-0.10301	0.723667	0.251474	0.104149	0.670182
1	5	22.3757	56	23	2	383.14	NA	NA	NA	NA	NA	NA	NA	NA	NA	NA	NA	NA	NA	NA	NA	NA	NA	NA	NA	NA	NA	NA	NA	NA	NA	NA	NA	NA	NA	NA	NA	NA	NA	NA	NA	NA	NA	NA	NA	NA	NA	NA	NA
1	4	19.7326	58	22	2	383	0.536775	0.524628	-0.700827	0.593071	0.540452	-0.476923	1.68969	1.34511	-1.65913	-0.187422	-0.18591	0.159853	0.726004	0.36292	-0.21372	-0.0712	0.0547	0.198443	-0.343708	-0.161022	0.250687	-0.0864	0.0728	0.0383	-1.08273	-1.08016	1.13544	0.488326	0.846416	-0.771556	-1.6148	-1.16205	1.20228	2.02291	1.99823	-2.11287	0.402557	0.239594	0.00254	-0.0604	-0.0451	0.0832	-0.164279
2	5	21.6609	63	22	1	376.33	-0.217901	0.0849	-0.0489	0.532556	0.120318	-0.0704	-0.1881	-1.20733	0.118149	0.318652	0.485971	-0.0779	0.450164	0.697675	-0.105757	-0.0136	-0.218317	0.00783	1.35984	1.07895	-0.0768	0.0049	-1.70707	0.0603	0.294168	0.279751	-0.0348	0.329926	0.388036	-0.0346	-0.224274	-2.45873	0.105231	0.293965	0.0279	-0.0368	-0.612014	-0.268015	0.255241	-7.37045	-6.06445	1.38123	-0.210661
1	7	26.0802	85	24	1	376.14	0.0904	0.301727	0.00546	0.0955	0.525063	0.0168	0.336545	0.66327	-0.0154	0.24362	0.486908	0.0119	0.0431	0.464331	0.0184	0.0737	0.713388	-0.0303	0.27565	0.729321	-0.0218	0.272855	0.468979	-0.0495	-0.00183	-0.0138	-0.00129	0.22032	0.721911	-0.00287	-0.239552	-1.94912	0.174768	0.386196	1.26428	-0.0304	-0.00408	0.465372	0.0481	-0.169323	0.519199	-0.00367	0.28049
1	5	22.4327	69	23	1	373.6	0.398126	0.356113	-0.0964	0.433105	0.348634	-0.0433	0.0374	0.0438	-0.0864	0.522929	0.528396	-0.107382	0.466133	0.112946	-0.0465	-0.0402	-0.00479	-0.0735	0.571006	0.443708	-0.0972	-0.576681	-0.49121	0.113136	0.323971	0.224171	-0.1	0.639058	0.454074	-0.1023	-0.757217	-1.02445	0.180014	0.678049	0.345336	-0.154988	0.287557	0.148564	-0.0903	0.314607	0.230908	-0.0465	0.0109
2	6	18.7471	49	22	2	372.4	0.0165	-0.0326	0.0291	0.461739	0.515806	0.0386	-0.175728	-0.0217	0.0134	-0.114512	-0.143411	0.0486	0.169385	0.157623	0.0489	0.172656	0.0856	0.0103	-0.317709	-0.246445	0.0223	0.0167	0.0151	-0.0138	-0.292349	-0.37602	0.0204	-0.188381	-0.268345	0.0191	0.186811	0.175562	-0.018	-0.14379	-0.453178	-0.0237	0.235287	0.221189	-0.246769	1.4242	1.57246	-1.27274	1.44791
1	8	16.25	45	26	2	370.43	0.0484	-0.196747	-0.00178	0.0282	-0.279122	0.00338	0.0968	-0.118331	0.0264	-0.00161	-0.129165	-0.0222	0.0652	-0.338059	0.120428	-0.148904	-0.0762	0.0291	-0.137064	-0.0594	0.0883	0.761063	0.00117	0.0851	0.131471	-0.108344	0.0622	0.380123	0.0699	-0.0176	0.939933	0.023	-0.00938	0.463395	-0.0949	0.0316	0.596896	1.40457	-0.516184	0.0473	-2.65265	-1.81941	0.034
2	5	22.4383	73	24	1	365.33	0.584481	0.55462	-0.0958	-3.55388	1.58703	-0.252635	-0.0997	-0.125489	0.0966	1.35881	0.821063	-0.0899	1.6717	1.71573	-0.421215	-1.18576	-0.796645	0.0886	0.0245	-0.0329	-0.0188	-1.04302	-0.843669	0.244085	0.907291	0.737496	-0.0791	0.80499	0.659525	-0.0107	-0.680445	-0.075	0.173294	0.318062	-0.772347	0.0639	0.258272	0.260672	0.0139	0.0662	2.75474	-0.740471	1.00611
2	13	23.6678	68	0	1	365.14	0.0491	-0.00184	-0.00459	0.207789	0.402581	0.0295	0.668076	0.718566	0.0209	0.221407	0.362264	-0.0175	0.622993	0.484844	-0.00403	9.52e-05	-0.000649	0.00203	0.547539	0.480283	-0.00982	0.432208	1.64008	-0.240802	0.00517	0.00443	0.000147	0.310202	0.233634	-0.00994	-1.00072	0.55521	-0.103663	0.448088	0.133683	0.000117	0.528182	0.533072	-0.00763	0.270635	0.298108	0.00264	1.04038
1	6	23.737	68	24	1	364.67	0.099	0.00819	0.03	0.180123	-0.0154	0.0275	-0.112947	0.0539	0.0419	0.11121	-0.168157	-0.0355	0.098	0.00182	0.02	0.0262	-0.0995	-0.0103	0.811772	-0.73454	-0.199943	-0.131002	-0.00743	0.0507	-0.218728	-0.0158	0.0281	-0.0597	0.097	0.0138	-0.247843	0.0359	0.0577	-0.156025	0.08	0.0186	0.00167	0.0365	0.043	-0.188159	0.11854	0.0284	0.447809
2	6	22.571	68	22	2	362.25	-0.0305	0.0757	-0.0921	-0.426294	0.0208	-0.0237	-0.331952	0.114408	-0.0229	-0.297831	0.0812	-0.0322	0.192946	0.11245	-0.110679	-0.334745	0.0463	0.00874	-0.133651	0.117541	-0.0312	-0.302869	0.0532	0.0346	-0.189202	0.0636	-0.000711	-0.149345	0.143781	-0.00761	-0.051	0.482914	0.0219	-0.2233	0.118212	0.0139	-2.19046	1.68023	-0.348072	1.42998	-0.364911	0.0718	1.06431
1	5	24.92	64	23	2	362.17	-0.0192	-0.132885	-0.0494	0.0183	-0.00624	-0.115525	-0.0565	-0.204407	-0.00916	-0.0624	0.0453	-0.0237	-0.452445	-0.831394	0.00626	-0.0139	-0.0803	-0.014	-0.141268	-0.245212	-0.187783	0.244832	0.157257	0.00111	-0.0969	-0.122135	-0.00628	0.118505	0.214401	-0.0702	0.143296	0.100237	0.0456	0.0356	-0.00162	0.00784	0.530941	-0.0247	-0.413424	-0.352426	-0.842228	-0.0874	0.767055
2	8	17.0798	42	26	2	360.86	0.358312	0.0205	0.0114	-0.158652	0.0122	-0.0157	0.00696	-0.300378	0.172484	0.210805	0.165913	-0.150749	0.112835	-0.082	-0.0342	-0.0744	-0.299796	0.242474	0.014	-0.0575	-0.0229	-0.0368	-0.220444	0.167056	0.0173	0.00963	-0.00388	-0.000952	-0.0124	0.000303	0.0891	-0.449467	-0.0194	-0.0672	-0.0596	-0.00601	-0.582927	-0.740234	0.797078	0.211365	-0.380277	0.412187	0.102838
1	6	25.3266	76	23	1	358.29	0.165224	0.261393	-0.101146	0.855012	-0.191436	-0.203303	-0.364474	-0.250998	0.506906	-0.07	-0.115986	0.232226	-0.00209	0.394861	0.101679	0.564751	0.555538	-0.48974	1.28264	1.55497	-1.30445	-0.160287	-0.199667	0.183282	1.80321	1.44713	-1.53599	0.172369	0.511105	0.103893	0.164004	0.788549	-0.576162	-0.0473	0.976758	0.0881	-0.00839	-0.108649	0.0104	0.91959	-1.86109	-0.377719	-0.0177
2	10	23.4898	58	24	2	357	NA	NA	NA	NA	NA	NA	NA	NA	NA	NA	NA	NA	NA	NA	NA	NA	NA	NA	NA	NA	NA	NA	NA	NA	NA	NA	NA	NA	NA	NA	NA	NA	NA	NA	NA	NA	NA	NA	NA	NA	NA	NA	NA
1	8	17.7722	48	27	2	356.29	0.478486	0.075	-0.0447	0.124612	-0.0963	-0.0211	0.162606	-0.0646	-0.0307	0.164764	-0.0052	-0.0172	-0.0686	-0.250157	0.0222	-0.00126	-0.0021	0.00248	-0.150627	-0.281409	0.00889	-0.0011	-0.00151	0.00257	-0.0512	-0.0129	0.00395	-0.100577	-0.228911	0.0161	-0.779958	0.101186	0.0199	-0.113453	0.0408	0.00504	-0.313782	0.203351	0.039	-0.605822	-0.127336	0.0311	-0.987295
1	6	21.6794	56	23	2	355.17	0.470799	-0.0953	0.0274	1.45694	-0.386375	0.0901	0.773218	0.181063	-0.0423	-0.495807	0.546484	-0.0924	-0.801878	0.0869	0.0129	0.873126	0.269326	-0.032	-0.835107	0.41697	-0.055	0.522993	0.0529	0.0604	1.06789	0.218561	-0.0515	0.763574	0.184999	0.0111	1.14905	0.652216	0.00593	1.22923	0.445365	-0.0674	-2.42758	0.780197	-0.415747	-0.12779	0.495253	-0.18984	-5.07455
1	6	22.5694	64	26	1	349.8	-0.175507	-0.894417	-0.0179	0.0811	-0.328934	0.0193	-0.360706	-1.20714	0.0255	0.035	0.161999	-0.00348	0.354699	-0.649981	-0.0479	0.00176	0.0034	-0.00273	0.585887	-0.220211	-0.0621	0.00357	0.00414	-0.00264	0.00967	0.011	-0.00302	0.399985	-0.00212	-0.0643	-0.804976	-0.661249	0.0387	0.373708	-0.146491	-0.0708	0.194557	-0.230274	0.0162	0.186237	0.0915	-0.0403	-0.175014
1	7	24.5409	70	26	1	347.83	0.0641	0.783387	-0.012	0.223674	0.753569	-0.0385	0.226513	0.468262	-0.10286	0.509629	0.716616	-0.0428	0.401022	-0.398966	0.0041	0.225213	0.213392	0.00328	0.201158	0.329999	0.0188	0.209263	-0.0904	-0.0171	0.0178	0.331527	0.0378	-0.165043	1.85053	0.170543	0.102538	-0.126224	-0.0214	-0.658079	2.22331	0.273423	0.349365	0.528358	-0.0784	0.390119	-0.557884	-0.0832	0.0662
1	6	21.7993	63	24	1	347.5	0.5341	0.0736	-0.0152	0.410503	0.164849	-0.0692	0.530317	-0.108462	-0.0369	0.45734	0.0895	-0.0292	0.789099	-0.332443	-0.0813	0.220061	-0.00745	-0.0178	0.4804	0.266395	-0.0333	-0.102506	0.0061	0.0146	0.0832	0.0437	-0.0203	0.382415	0.304979	-0.0249	0.0535	-0.506353	0.0603	0.699898	0.391565	-0.055	0.293025	-0.17815	-0.029	7.34043	-1.06402	-0.221253	0.398895
1	7	19.8541	62	23	1	346.8	NA	NA	NA	NA	NA	NA	NA	NA	NA	NA	NA	NA	NA	NA	NA	NA	NA	NA	NA	NA	NA	NA	NA	NA	NA	NA	NA	NA	NA	NA	NA	NA	NA	NA	NA	NA	NA	NA	NA	NA	NA	NA	NA
2	7	16.7091	48	24	1	346.71	0.237688	0.29812	-0.0336	0.0286	0.000959	0.00536	-0.447684	-0.205652	0.0435	-0.0879	0.165214	0.0876	0.117715	0.246259	0.0173	-0.234451	-0.0485	0.0933	0.574543	1.03686	-1.00835	-1.63031	-1.15724	0.568474	-0.0646	-0.200492	0.225861	1.20842	1.31123	-0.741646	-1.14334	-0.663065	0.117443	0.828782	0.635281	-0.397569	1.77572	0.805149	-1.32391	1.23644	-0.0507	-0.479173	2.78277
2	8	25.917	70	28	1	333.43	NA	NA	NA	NA	NA	NA	NA	NA	NA	NA	NA	NA	NA	NA	NA	NA	NA	NA	NA	NA	NA	NA	NA	NA	NA	NA	NA	NA	NA	NA	NA	NA	NA	NA	NA	NA	NA	NA	NA	NA	NA	NA	NA
1	5	23.4602	67	30	2	325.71	-0.119224	-0.215441	0.14318	0.0518	-0.167331	0.0339	0.0748	-0.00678	0.0483	-0.169029	0.00349	0.0798	0.00216	-0.106151	0.04	-0.0812	-0.00385	-0.00123	0.0396	-0.751204	0.145239	0.0795	-0.14486	-0.0207	0.00706	0.0316	0.0426	0.0079	-0.0598	0.0435	0.0237	-0.0174	0.00992	-0.000203	0.17803	0.041	0.0269	0.149481	0.0483	-0.168681	-0.101331	0.147268	-0.0295
1	9	26.3725	85	28	2	318.6	1.38302	0.0547	-0.112995	2.43353	-0.63828	-0.497818	0.46997	0.325728	-0.029	2.12249	0.948148	-0.291518	1.78716	-0.668191	-0.25996	1.07885	0.711959	-0.141561	1.92213	1.17558	-0.20622	0.0573	0.1221	-0.00425	1.58575	0.499979	-0.290306	0.326811	0.591622	-0.0268	0.10712	0.345396	0.0195	0.135492	0.896762	0.0294	0.844393	-0.228224	-0.0771	1.13358	-0.08	-0.255646	0.419666
1	6	20.9259	68	24	1	318.33	0.0779	0.444505	-0.154766	-0.484754	-0.923841	-0.149592	-0.0758	0.491316	0.107172	0.329429	1.83923	-0.476085	-0.501371	-1.2527	0.0159	0.300959	2.244	-0.226306	-1.19168	-0.974611	-0.276046	-0.85287	-0.411338	0.332987	0.462232	1.81152	-0.266952	-0.292761	-0.203968	0.230846	-0.953069	0.0983	-0.0357	0.277511	0.391825	0.0752	0.118966	1.06492	-0.230068	-0.363138	-2.74675	-0.173397	0.646875
1	10	22.3279	68	27	1	317.29	0.108821	-0.117719	-0.00509	1.61479	1.60197	-0.516503	0.0772	-0.0262	0.0249	0.142183	-0.0823	0.0154	-0.516781	0.167803	-0.0924	-0.0292	-0.125275	0.0252	0.596056	0.137818	-0.019	-0.205595	0.0224	0.074	0.00859	-0.275185	0.0054	0.564686	0.107513	-0.012	-0.0947	0.101039	0.0722	0.355848	0.251125	-0.00493	-0.328302	-0.35762	-0.0115	-0.218438	-0.682202	0.139027	0.285686
1	9	27.6839	80	26	2	314	1.3034	0.319809	-0.13698	2.36793	1.01424	-0.054	0.566368	-0.66183	-0.00984	1.36864	0.215446	-0.17332	1.15201	0.499835	0.0237	0.199181	-1.24783	-0.00404	0.926523	-0.685332	-0.100498	0.48858	-0.862235	0.00652	0.915834	-0.117485	-0.0988	0.288855	-0.457968	0.0173	0.669518	0.532025	-0.0822	0.026	-1.15212	0.0264	0.420657	-0.0479	-0.0248	0.882175	0.139645	-0.117959	-0.644897
2	8	22.8	59	26	2	308.43	-0.000407	0.126016	-0.0457	-0.0942	-0.0128	-0.00978	-0.219443	-0.0139	0.0056	-0.101845	-0.161571	0.0102	-0.114616	-0.0955	-0.0611	0.0347	0.0279	0.0297	-0.093	-0.359574	-0.0609	-0.0524	-0.0307	0.00265	-0.0368	-0.121455	0.00507	-0.18474	0.0435	-0.0398	-0.229568	0.339863	0.0452	-0.229106	0.029	0.0287	-1.09543	-0.419248	0.0732	-0.421101	-0.0915	0.0262	-0.349793
2	7	26.9537	85	25	1	306.14	0.37337	-0.244436	0.0686	0.725066	0.130132	0.033	0.315824	-0.280868	0.0656	0.418507	-0.133736	0.0669	0.165558	-0.153518	0.0837	0.288726	-0.529141	0.106523	0.306008	-0.692337	0.0563	-0.0106	0.0968	0.0202	0.514139	-0.689442	0.105627	0.319846	-0.305345	0.0336	0.047	0.118102	0.0537	0.358262	-0.728893	0.0741	0.296701	-0.191306	0.0698	0.129345	-0.209824	0.186979	0.378705
1	7	19.7777	50	23	2	300.83	1.97404	-1.50191	0.86712	1.26543	0.00498	0.102563	-0.607318	-1.12264	0.784989	0.165822	-0.0846	0.146347	0.863469	-0.186638	0.0337	-0.542467	-0.242202	0.0134	0.529353	-0.218853	-0.0199	0.0763	-0.435927	0.0552	-0.363944	-0.372876	0.045	0.0394	-0.0475	-0.0115	0.189752	-0.532724	0.0831	0.0165	-0.252773	0.000518	0.166926	-0.116524	0.27823	0.607914	-0.0625	0.215717	0.662329
1	5	27.8201	80	23	1	294.29	0.421645	0.273051	0.0145	0.200646	0.217251	0.0133	0.443722	0.396081	-0.00614	0.401486	0.299311	-0.121705	0.243818	0.0979	0.000325	0.521806	0.301477	-0.0934	0.61956	0.496443	-0.109757	-0.0324	-0.108744	0.0109	0.428818	0.219437	-0.0886	0.540405	0.32875	-4.23e-05	0.152003	0.33159	0.0582	0.668412	0.622887	-0.0229	-0.473677	-0.464198	0.48663	-0.504952	-0.209328	0.552639	0.509417
1	7	23.255	92	27	1	292.67	0.160692	-0.418485	0.0853	1.21664	-0.226858	-0.181856	0.0706	-0.0236	0.0187	0.0477	-0.20961	0.0775	0.832843	-0.421752	-0.0419	0.131585	0.155199	-0.0389	0.34163	0.0594	0.0647	-0.0853	0.166588	-0.0101	0.0703	0.00879	-0.0412	0.170201	0.00737	0.0315	-0.0236	0.205229	-0.0209	0.12111	0.101938	0.0246	1.78079	-0.384353	-0.0824	1.12745	-0.0415	-0.114112	1.36663
1	5	17.1394	NA	23	2	291.67	0.044	0.0901	0.0253	0.304281	1.20949	-0.148883	-0.213957	0.170568	0.0448	0.024	0.205885	0.0255	0.467567	0.67481	-0.0831	0.263937	0.233527	-0.00647	0.059	0.170724	0.024	0.126829	-0.12793	0.0256	0.0505	0.173668	0.0156	0.112408	0.307521	0.00598	0.144153	-0.145256	0.0554	0.183009	0.11474	-0.0119	0.421451	0.397527	-0.549669	1.45834	1.78042	-1.1754	-0.164534
[truncated: 61 more columns]
